# Supplementary material
Source: HighWire-hosted journal article supplement (https://www.jneurosci.org/highwire/filestream/600637/field_highwire_adjunct_files/1/legend.pdf)
Supplement: legend.pdf [file legend.pdf]

**Supplementary figure 1. Precision of the estimates of the cortical spread of the LFP.**

A: The mean value and standard deviation of the estimated value of the cortical spread of the LFP (blue squares and bars), when the visual spread for MUA is 400  $\mu\text{m}$ . On top of the blue markers, the true values of cortical spread for LFP at 50, 100, 150, 200, 250, 300 and 350  $\mu\text{m}$  were plotted as red diamonds. B, C and D are plotted in the same way as A, but the visual spread for MUA is 500, 600 and 700  $\mu\text{m}$  in B, C and D respectively.
